# Supplementary material for: Hysteretic DC electrowetting by field-induced nano-structurations on polystyrene films
Source: Royal Society of Chemistry journal article supplement (doi:10.1039/c5sm00007f), 2015-01-01
Supplement: c5sm00007f1.pdf [file c5sm00007f1.pdf]

**S1:** Table shows critical electric field for dielectric of varied thickness.

| <b>Sample No.</b> | <b>Dielectric thickness (<i>d</i>)<br/><math>\mu\text{m}</math></b> | <b>Critical voltage<br/>(V)</b> | <b>Critical Electric field<br/>(<math>\text{V}\mu\text{m}^{-1}</math>)</b> | <b>EW number<br/><math>\eta</math></b> |
|-------------------|---------------------------------------------------------------------|---------------------------------|----------------------------------------------------------------------------|----------------------------------------|
| 1                 | 2.98                                                                | +38                             | 13                                                                         | 0.14                                   |
|                   |                                                                     | -39                             | 13                                                                         | 0.15                                   |
| 2                 | 4.7                                                                 | +43                             | 10                                                                         | 0.12                                   |
|                   |                                                                     | -40                             | 9                                                                          | 0.1                                    |
| 3                 | 4.3                                                                 | +45                             | 11                                                                         | 0.14                                   |
|                   |                                                                     | -46                             | 10                                                                         | 0.14                                   |
| 4                 | 5.6                                                                 | +60                             | 11                                                                         | 0.19                                   |
|                   |                                                                     | -56                             | 10                                                                         | 0.16                                   |
