# Supplementary material for: Hysteretic DC electrowetting by field-induced nano-structurations on polystyrene films
Source: Royal Society of Chemistry journal article supplement (doi:10.1039/c5sm00007f), 2015-01-01
Supplement: c5sm00007f2.pdf [file c5sm00007f2.pdf]

## S2: AFM morphology of the PS surface pristine and electrowetted in ambient air.

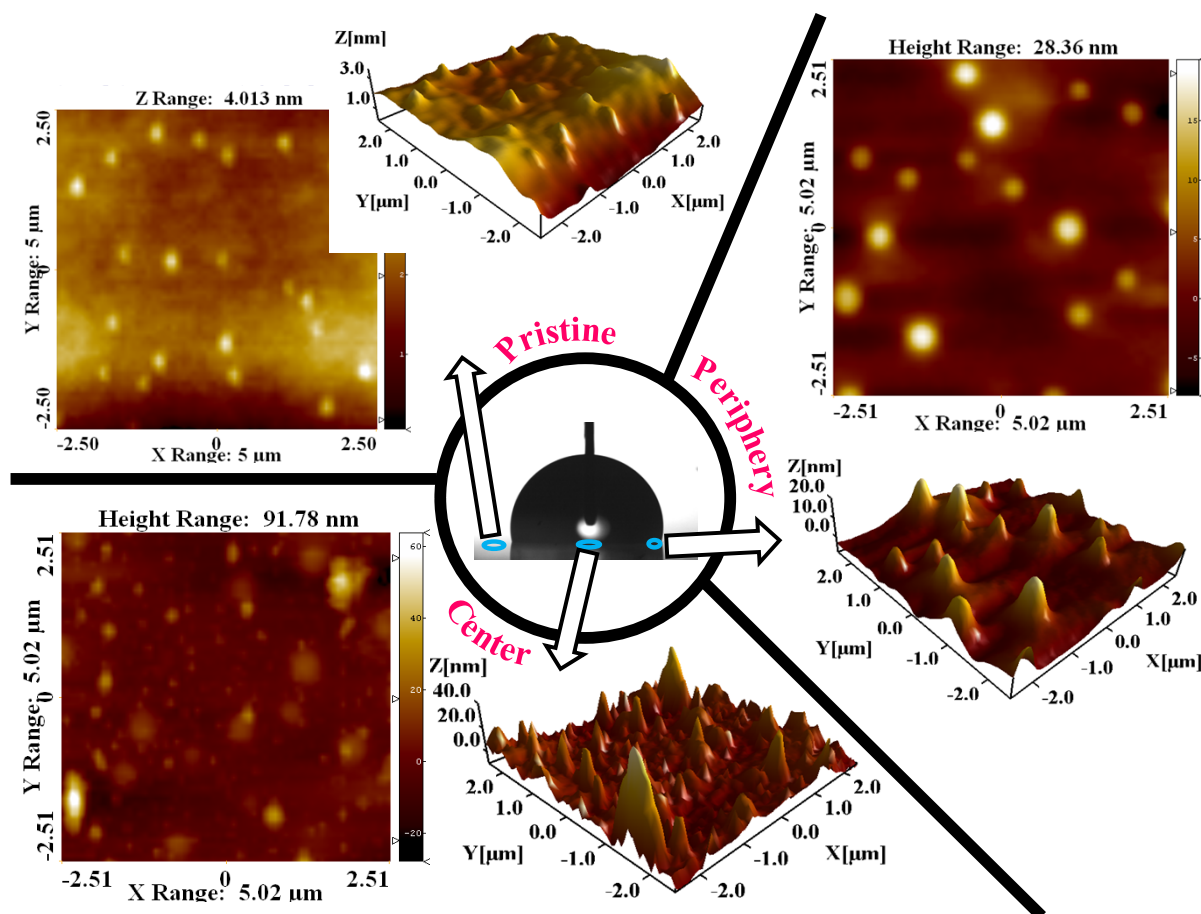

AFM micrograph shows the pristine polystyrene surface and electrowetted surface in ambient *air* for five voltage cycle. Images from two different droplet-contact positions mainly at the drop-center and drop-peripheral are clearly indicated by bold arrows.
